# Supplementary material
Source: publisher site journal article supplement (https://static.cambridge.org/content/id/urn:cambridge.org:id:article:S2040174420000380/resource/name/S2040174420000380supp002.doc)
Supplement: Supplementary file 1 [file S2040174420000380supp002.doc]

*Determination of saliva epigenetic age in infancy,*

*and its association with parental socioeconomic characteristics*

*and pregnancy outcomes*

**Supplementary Material**

**Supplementary Table S1……………………………………………………………..……………………………………….…..2**

**Supplementary Figure S1…………………………………………………………………………………………….……………3**

**Supplementary Figure S2…………………………………………………………………………………….……………………4**

**Supplementary Table S1. Chronological age and the predicted pediatric buccal epigenetic age (PedBE clock) in the NINFEA sample (N=139; two samples with more than 4SD in PedBE clock were removed)**

| Epigenetic and chronological age measures | Mean (SD) | Range |  |
| --- | --- | --- | --- |
|  |  |  |  |
| *Chronological age* (months) | 10.8 (2.2) | 7.0, 17.0 |  |
| *Pediatric buccal epigenetic age* (months) | 18.3 (7.6) | 8.3, 47.2 |  |
| Correlation between epigenetic and chronological age | Pearson r | p-value |  |
| *Pediatric buccal epigenetic age* (months) | 0.24 | 0.005 |  |
| Difference between epigenetic and chronological age | Mean (SD) | Range |  |
| *Pediatric buccal epigenetic age* (months) |  |  |  |
| Difference (months) | 7.5 (7.4) | -2.7, 33.6 |  |
| Absolute difference (months) | 7.6 (7.2) | 0.1, 33.6 |  |
| Regression epigenetic age ~ chronological age | Coef. | s.e. | R2 |
| *Pediatric buccal epigenetic age (months)* |  |  |  |
| Epigenetic age ~ chronological age | 0.82 | 0.29 | 0.05 |
| Epigenetic age ~ chronological age + chip  + chip) | 1.00 | 0.32 | 0.04 |
| Epigenetic age ~ chronological age + chip + cell type 1 + cell type 2 | 0.58 | 0.11 | 0.89 |
| SD – Standard deviation  Pearson r – Pearson correlation coefficient  Coef. – Regression Coefficient  s.e. – Standard error  R2 – Coefficient of determination | | | |

**Supplementary Figure S1. Scatterplot with smoothed regression line and 95% confidence intervals showing association of chronological age with Pediatric Buccal Epigenetic Clock estimated in infant saliva samples in the NINFEA birth cohort.**

**Supplementary Figure S2. Scatterplot with smoothed regression line and 95% confidence intervals showing association of Pediatric Buccal Epigenetic Clock estimated in infant saliva samples with the two saliva cell type proportions estimated using Houseman’s reference-free method.**
